# Supplementary material
Source: publisher site journal article supplement (https://www.spandidos-publications.com/4852/downloadSupplementary)

Figure S1. Morphological changes of the lung cancer cell lines H23 and H1650 following administration of realgar at different concentrations.

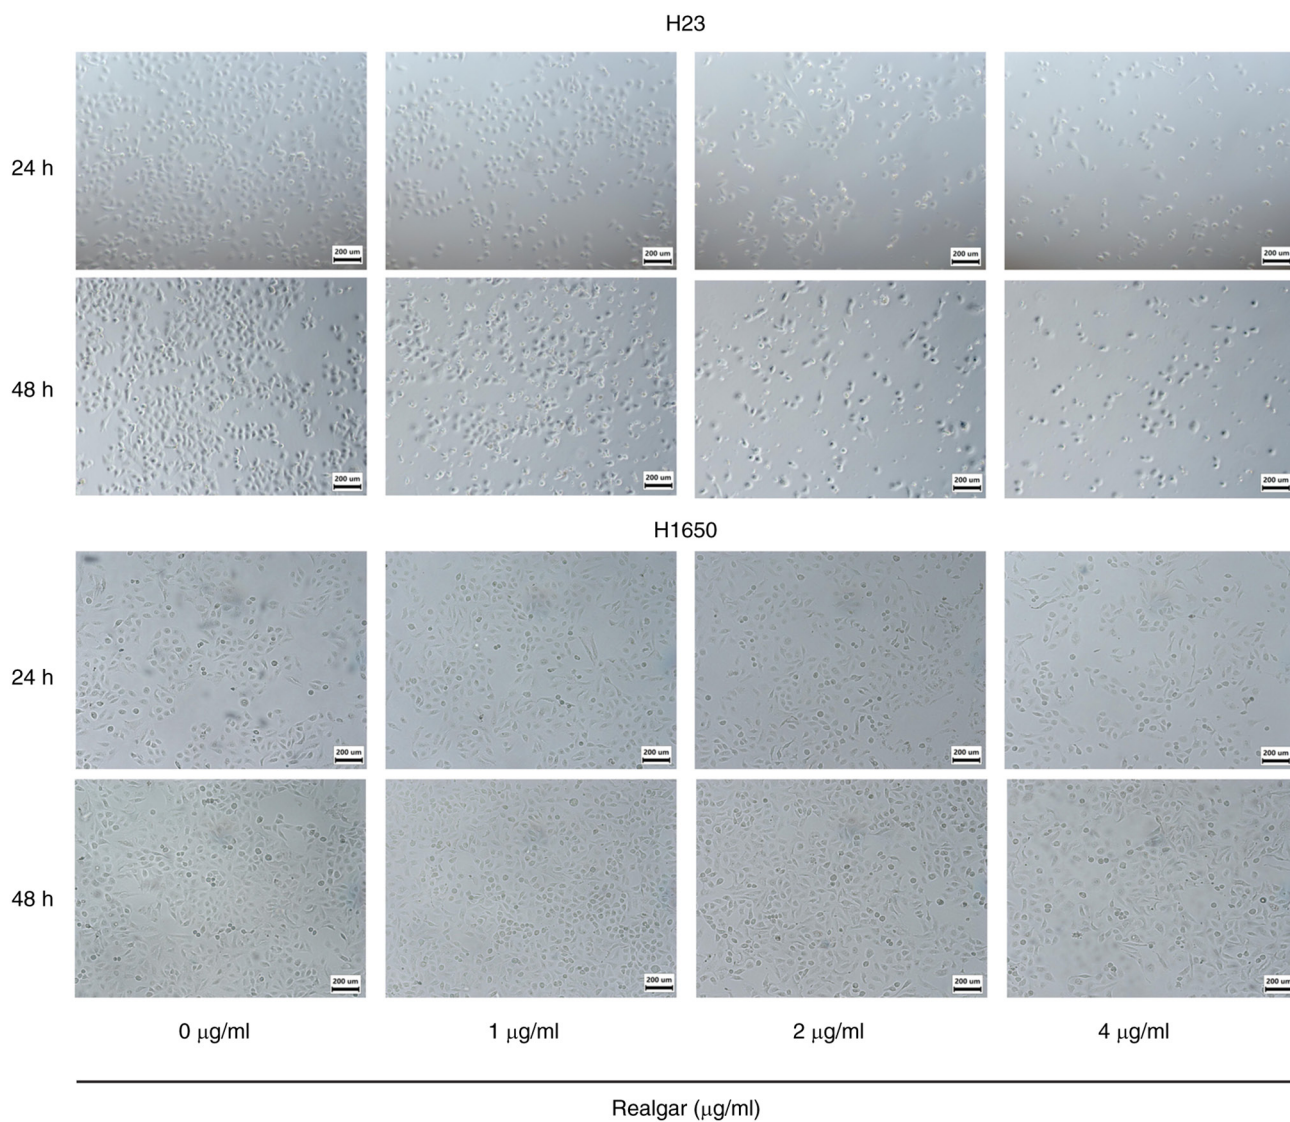

Supplement: Supplementary file 1 [file downloadSupplementary]
